# Supplementary material
Source: PubMed Central journal article supplement (PMC5053777)
Supplement: CJN.00190116SupplementaryData.pdf [file CJN.00190116SupplementaryData.pdf]

**Supplementary Table S1.** Categories for causes of death and graft loss used by the ANZDATA Registry

| Causes of death                                                                                                                                                                                                                                                                                                                                                                                                                                                                                                                                                                                                                                                                                                                                                                                                                                             | Causes of graft loss                                                                                                                                                                                                                                                                                                                                                                                                                                                                                                                                                                                                                                                                                                                                                                                                                                                                                         |
|-------------------------------------------------------------------------------------------------------------------------------------------------------------------------------------------------------------------------------------------------------------------------------------------------------------------------------------------------------------------------------------------------------------------------------------------------------------------------------------------------------------------------------------------------------------------------------------------------------------------------------------------------------------------------------------------------------------------------------------------------------------------------------------------------------------------------------------------------------------|--------------------------------------------------------------------------------------------------------------------------------------------------------------------------------------------------------------------------------------------------------------------------------------------------------------------------------------------------------------------------------------------------------------------------------------------------------------------------------------------------------------------------------------------------------------------------------------------------------------------------------------------------------------------------------------------------------------------------------------------------------------------------------------------------------------------------------------------------------------------------------------------------------------|
| <p><b>Cardiac</b><br/> Myocardial ischemia (presumed),<br/> Myocardial ischemia and infarction,<br/> Pulmonary edema,<br/> Hyperkalemia,<br/> Hemorrhagic pericarditis,<br/> Hypertensive cardiac failure,<br/> Cardiac arrest- cause uncertain,<br/> Other causes of cardiac failure</p> <p><b>Vascular</b><br/> Pulmonary embolus,<br/> Cerebrovascular accident,<br/> Gastrointestinal hemorrhage,<br/> Hemorrhage from dialysis access site,<br/> Hemorrhage from transplant artery,<br/> Aortic aneurysm rupture,<br/> Hemorrhage from elsewhere,<br/> Bowel infarction</p> <p><b>Infection</b><br/> Central nervous system<br/> Lung<br/> Urinary tract<br/> Wound<br/> Peritoneum<br/> Septicemia- site unknown<br/> Liver<br/> Site unknown</p> <p><b>Social</b><br/> Withdrawal for psychosocial reason<br/> Patient refused further treatment</p> | <p>Rejection<br/> Hyperacute rejection (within 48 hours)<br/> Acute rejection at any time<br/> Chronic allograft nephropathy</p> <p>Vascular<br/> Renal artery stenosis<br/> Renal artery thrombosis<br/> Renal vein thrombosis<br/> Renal vessel haemorrhage (primary)<br/> Renal vessel haemorrhage (secondary)<br/> Embolus- thrombo<br/> Embolus- cholesterol<br/> Hemolytic uremic syndrome</p> <p>Technical<br/> Nonviable kidney (due to pre-transplant cortical necrosis)<br/> Cortical necrosis post-transplant (not due to rejection)<br/> Ureteric and bladder problems</p> <p><b>Glomerulonephritis</b><br/> Mesangiocapillary GN with subendothelial deposits<br/> Mesangiocapillary GN with intramembranous deposits (dense deposit disease)<br/> Focal sclerosing GN (including hyalinosis)<br/> Membranous GN<br/> Mesangial proliferative GN (IgA positive)<br/> Goodpasture's syndrome</p> |

|                                                                                                                                                                                                                                                                                                                                                                                                                                                                                                                                                                                                                                                                                                                                                                       |                                                                                                                                                                                                                                                                                                                                                                                                                                                                                                                                                                |
|-----------------------------------------------------------------------------------------------------------------------------------------------------------------------------------------------------------------------------------------------------------------------------------------------------------------------------------------------------------------------------------------------------------------------------------------------------------------------------------------------------------------------------------------------------------------------------------------------------------------------------------------------------------------------------------------------------------------------------------------------------------------------|----------------------------------------------------------------------------------------------------------------------------------------------------------------------------------------------------------------------------------------------------------------------------------------------------------------------------------------------------------------------------------------------------------------------------------------------------------------------------------------------------------------------------------------------------------------|
| <p>Suicide</p> <p>Therapy ceased for any other reason</p> <p>Accidental death</p> <p>Withdrawal for cardiovascular comorbid conditions</p> <p>Withdrawal for cerebrovascular comorbid conditions</p> <p>Withdrawal for peripheral vascular comorbid conditions</p> <p>Withdrawal related to malignancy</p> <p>Withdrawal related to dialysis access difficulties</p> <p><b>Miscellaneous</b></p> <p>Hepatic failure</p> <p>Uremia caused by graft failure</p> <p>Pancreatitis</p> <p>Bone marrow depression</p> <p>Cachexia</p> <p>Unknown</p> <p>Malignant disease</p> <p>Perforation of abdominal viscus</p> <p>Dialysis dementia</p> <p>Others</p> <p>Immunodeficiency due to viral infection</p> <p>Chronic respiratory failure</p> <p>Sclerosing peritonitis</p> | <p>Intra and extra capillary GN with extensive crescents (clinically rapidly progressive)</p> <p>Other</p> <p><b>Drug therapy</b></p> <p>Complications of drug therapy requiring reduction or withdrawal of steroid and/or immunosuppressants</p> <p>Non-compliance with therapy- causing graft failure</p> <p>Rejection following I/S reduction due to malignancy</p> <p>Rejection following I/S reduction due to infection</p> <p><b>Miscellaneous</b></p> <p>Other</p> <p>Donor malignancy</p> <p>Malignancy invading graft</p> <p>BK virus nephropathy</p> |
|-----------------------------------------------------------------------------------------------------------------------------------------------------------------------------------------------------------------------------------------------------------------------------------------------------------------------------------------------------------------------------------------------------------------------------------------------------------------------------------------------------------------------------------------------------------------------------------------------------------------------------------------------------------------------------------------------------------------------------------------------------------------------|----------------------------------------------------------------------------------------------------------------------------------------------------------------------------------------------------------------------------------------------------------------------------------------------------------------------------------------------------------------------------------------------------------------------------------------------------------------------------------------------------------------------------------------------------------------|

**Supplementary Table S2.** Death after graft loss according to the three mTOR inhibitor use categories

|                                         | <b>mTOR inhibitor use group</b> |                                                | <b>mTOR inhibitor non-use group</b> |                                                |
|-----------------------------------------|---------------------------------|------------------------------------------------|-------------------------------------|------------------------------------------------|
| <b>Time</b>                             | <b>Number of deaths</b>         | <b>Death rate per 100 person-years, 95% CI</b> | <b>Number of deaths</b>             | <b>Death rate per 100 person-years, 95% CI</b> |
| <i>Last observation carried forward</i> |                                 |                                                |                                     |                                                |
| 0 – 1 year                              | 14                              | 16.4, 9.7 to 26.7                              | 152                                 | 17.1, 14.6 to 20                               |
| After 1 year                            | 7                               | 2.7, 1.3 to 5.6                                | 186                                 | 7.7, 6.7 to 8.9                                |
| <i>At baseline</i>                      |                                 |                                                |                                     |                                                |
| 0 – 1 year                              | 11                              | 11.4, 8 to 25.9                                | 155                                 | 17.2, 14.7 to 20.2                             |
| After 1 year                            | 19                              | 8.6, 5.5 to 13.4                               | 174                                 | 7.1, 6.1 to 8.3                                |
| <i>At 1-year</i>                        |                                 |                                                |                                     |                                                |
| 0 – 1 year                              | 11                              | 16.3, 9 to 29.5                                | 155                                 | 17.1, 14.6 to 20                               |
| After 1 year                            | 13                              | 7.1, 4.1 to 12.3                               | 180                                 | 7.2, 6.3 to 8.4                                |

**Supplementary Figure S1.** Schematic description of survival analyses

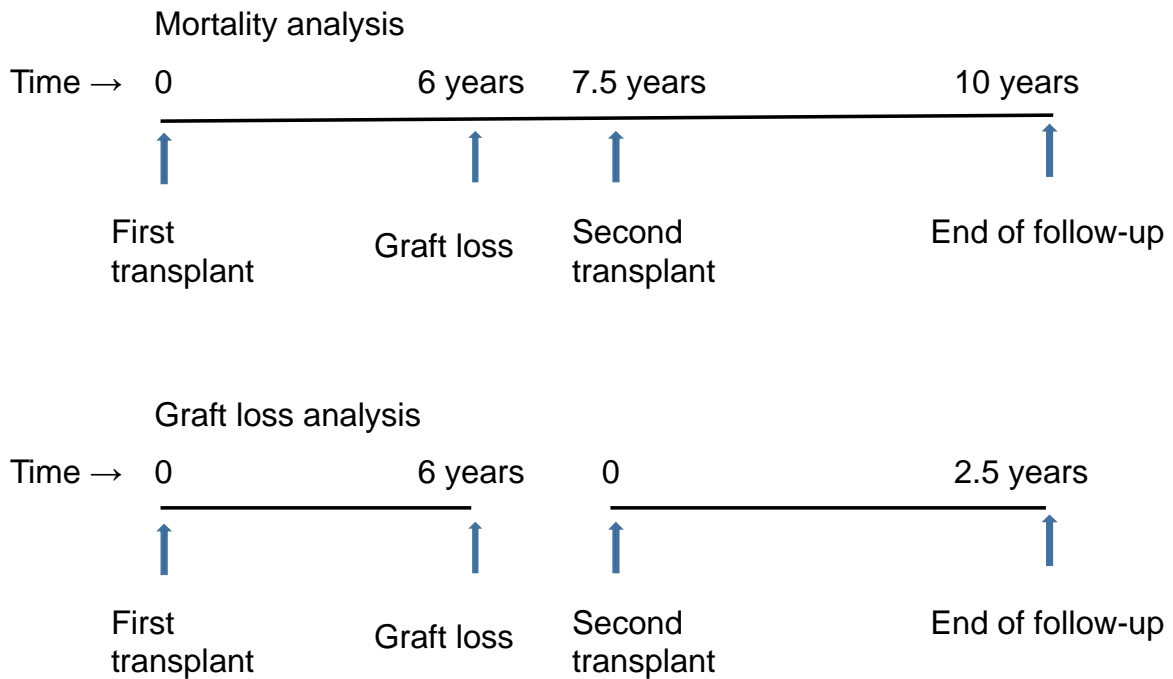

Survival time for the mortality analysis was not censored at graft loss. Survival time was calculated from the date of transplant surgery to the date of death or 31 December 2013.

To accommodate repeat kidney transplants, data were analyzed using a variance-correction conditional-risk set model for ordered allograft loss events with time for subsequent transplant events reset using the gap time method. In this method, survival time for graft loss was reset to zero at the time of second and third transplant surgeries. Survival time was calculated from the date of transplant surgery to the date of graft loss or 31 December 2013.

**Supplementary Figure S2.** Flow diagram showing death and graft loss outcomes

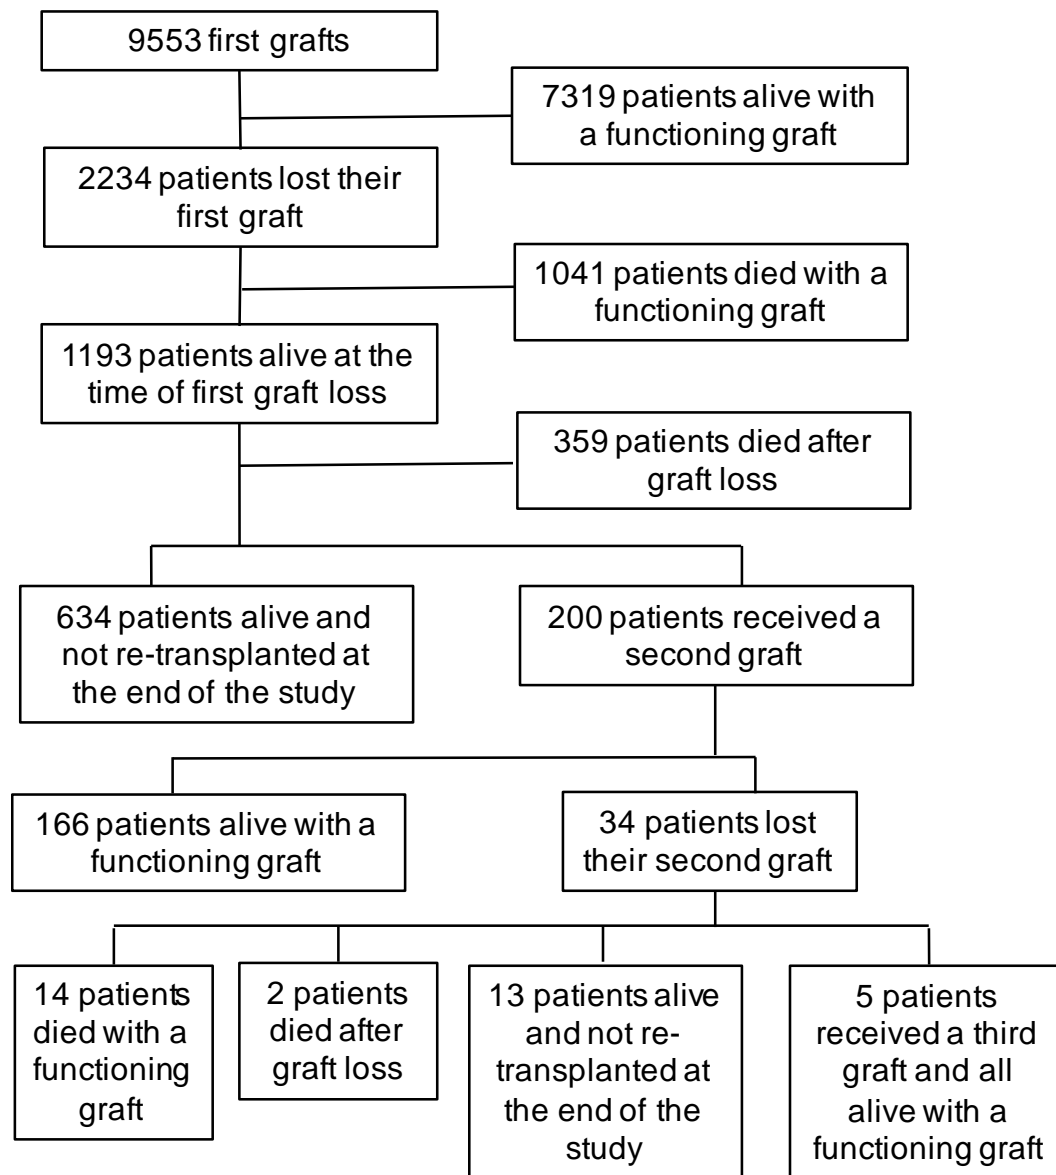

**Supplementary Figure S3.** The association between mTOR inhibitor use and death with functioning graft according to pre-transplant cancer status

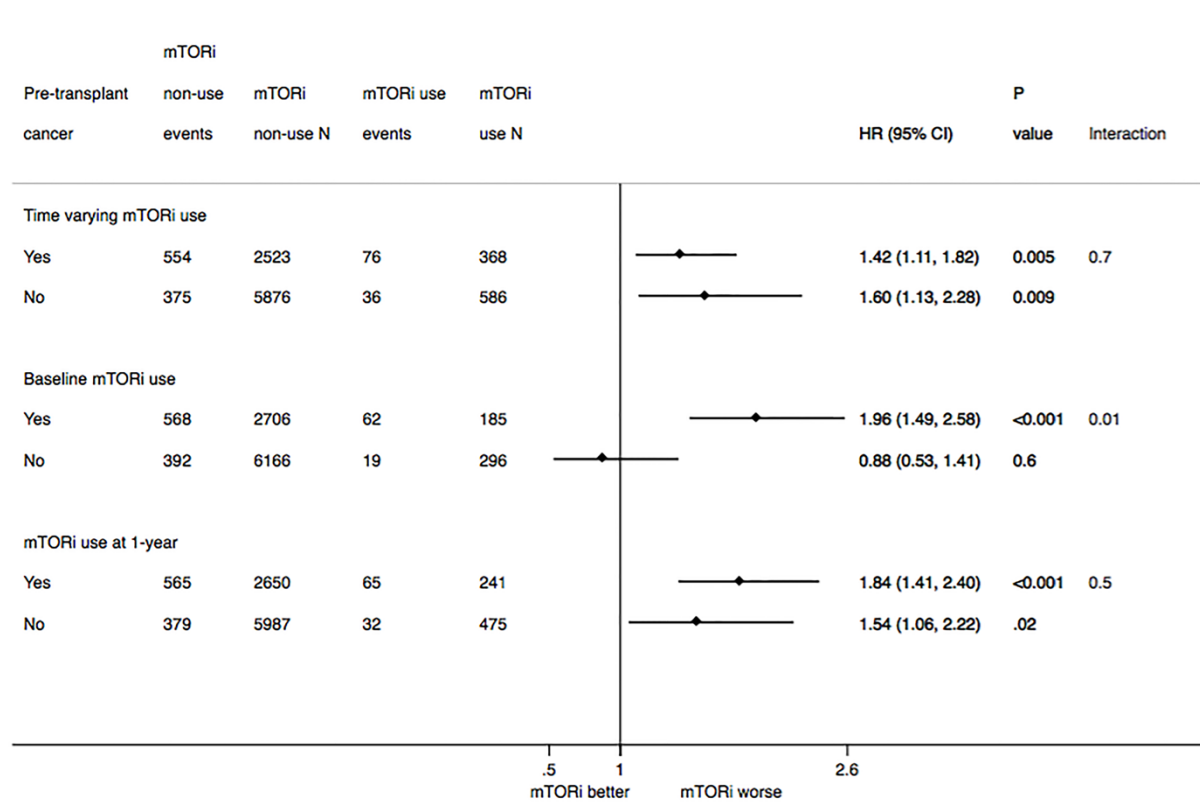

Note: All analyses included first graft only.
